# Supplementary material for: Modeling vulnerability and intervention targets in the Borderline Personality Disorder system: A network analysis of in silico and in vivo interventions
Source: PLoS One. 2023 Jul 31;18(7):e0289101. doi: 10.1371/journal.pone.0289101 (PMC10389718; doi:10.1371/journal.pone.0289101)
Supplement: S1 Appendix — Stability of all connections and measures of centrality estimated with bootstraping. (XLSX) [file pone.0289101.s001.xlsx]

## Sheet: Sheet1
type	node1	node2	mean	sd	CIlower	CIupper
edge	B1	B10	0.01	0.03	-0.07	0.07
edge	B1	B11	0.16	0.07	0.02	0.3
edge	B1	B12	0.04	0.05	-0.11	0.11
edge	B1	B2	0.12	0.07	-0.03	0.26
edge	B1	B3	0.14	0.08	-0.01	0.32
edge	B1	B4	0.04	0.06	-0.08	0.16
edge	B1	B5	0.07	0.07	-0.13	0.13
edge	B1	B6	0.08	0.07	-0.05	0.21
edge	B1	B7	0.05	0.06	-0.07	0.17
edge	B1	B8	0	0.01	-0.02	0.02
edge	B1	B9	0.19	0.06	0.05	0.31
edge	B10	B11	0.14	0.07	0.03	0.3
edge	B10	B12	0.01	0.03	-0.06	0.06
edge	B11	B12	0.09	0.07	-0.01	0.26
edge	B2	B10	0	0.02	-0.04	0.04
edge	B2	B11	0.01	0.02	-0.05	0.05
edge	B2	B12	0.01	0.03	-0.05	0.05
edge	B2	B3	0.08	0.07	-0.05	0.25
edge	B2	B4	0.02	0.05	-0.09	0.09
edge	B2	B5	0.09	0.07	-0.04	0.25
edge	B2	B6	0.04	0.05	-0.11	0.11
edge	B2	B7	0.06	0.06	-0.05	0.21
edge	B2	B8	0.01	0.02	-0.05	0.05
edge	B2	B9	0.03	0.05	-0.1	0.1
edge	B3	B10	0	0	0	0
edge	B3	B11	0.01	0.03	-0.06	0.06
edge	B3	B12	0	0.02	-0.04	0.04
edge	B3	B4	0.16	0.07	0.03	0.32
edge	B3	B5	0.01	0.03	-0.05	0.05
edge	B3	B6	0.02	0.04	-0.09	0.09
edge	B3	B7	0.17	0.07	0.04	0.33
edge	B3	B8	0.07	0.07	-0.03	0.24
edge	B3	B9	0	0.02	-0.03	0.03
edge	B4	B10	0	0.01	-0.02	0.02
edge	B4	B11	0.06	0.07	-0.05	0.21
edge	B4	B12	0	0.02	-0.04	0.04
edge	B4	B5	0.1	0.07	-0.01	0.28
edge	B4	B6	0.14	0.07	0.02	0.28
edge	B4	B7	0.17	0.06	0.06	0.31
edge	B4	B8	0.02	0.04	-0.09	0.09
edge	B4	B9	0	0.02	-0.04	0.04
edge	B5	B10	0.01	0.03	-0.07	0.07
edge	B5	B11	0	0.01	-0.01	0.01
edge	B5	B12	0.01	0.02	-0.05	0.05
edge	B5	B6	0.04	0.05	-0.11	0.11
edge	B5	B7	0.02	0.04	-0.08	0.08
edge	B5	B8	0.05	0.07	-0.04	0.25
edge	B5	B9	0.01	0.04	-0.07	0.07
edge	B6	B10	0.05	0.06	-0.06	0.18
edge	B6	B11	0.01	0.03	-0.06	0.06
edge	B6	B12	0.16	0.07	0.02	0.3
edge	B6	B7	0.11	0.07	-0.02	0.26
edge	B6	B8	0	0.02	-0.05	0.05
edge	B6	B9	0	0	-0.01	0.01
edge	B7	B10	0	0	0	0
edge	B7	B11	0.07	0.07	-0.04	0.23
edge	B7	B12	0.04	0.05	-0.05	0.16
edge	B7	B8	0.24	0.06	0.15	0.37
edge	B7	B9	0.01	0.03	-0.06	0.06
edge	B8	B10	0.43	0.06	0.34	0.57
edge	B8	B11	0.01	0.03	-0.06	0.06
edge	B8	B12	0	0	-0.01	0.01
edge	B8	B9	0.01	0.04	-0.08	0.08
edge	B9	B10	0.01	0.02	-0.05	0.05
edge	B9	B11	0.04	0.05	-0.1	0.1
edge	B9	B12	0.15	0.08	0.03	0.33
edge	Treat	B1	-0.08	0.09	-0.19	0.19
edge	Treat	B10	0	0.01	-0.02	0.02
edge	Treat	B11	-0.02	0.05	-0.11	0.11
edge	Treat	B12	-0.23	0.12	-0.5	-0.02
edge	Treat	B2	-0.15	0.12	-0.39	0.09
edge	Treat	B3	-0.23	0.12	-0.5	-0.02
edge	Treat	B4	-0.19	0.12	-0.45	0.04
edge	Treat	B5	-0.01	0.03	-0.06	0.06
edge	Treat	B6	-0.19	0.12	-0.4	0.08
edge	Treat	B7	-0.01	0.03	-0.07	0.07
edge	Treat	B8	0	0.01	-0.02	0.02
edge	Treat	B9	-0.03	0.06	-0.13	0.13
strength	B1		0.96	0.16	0.47	1.11
strength	B10		0.67	0.11	0.46	0.89
strength	B11		0.62	0.13	0.37	0.89
strength	B12		0.73	0.15	0.47	1.08
strength	B2		0.61	0.17	0.19	0.89
strength	B3		0.89	0.16	0.66	1.29
strength	B4		0.92	0.17	0.62	1.3
strength	B5		0.41	0.13	0.08	0.6
strength	B6		0.84	0.16	0.41	1.06
strength	B7		0.94	0.15	0.74	1.34
strength	B8		0.85	0.11	0.69	1.15
strength	B9		0.48	0.13	0.1	0.62
strength	Treat		1.14	0.27	0.49	1.57
